# Supplementary material for: Building Global Capacity for Conducting Operational Research Using the SORT IT Model: Where and Who?
Source: PLoS One. 2016 Aug 9;11(8):e0160837. doi: 10.1371/journal.pone.0160837 (PMC4978462; doi:10.1371/journal.pone.0160837)
Supplement: S1 Dataset — (XLSX) [file pone.0160837.s001.xlsx]

## Sheet: Data
SORT-IT Study Data
id	course	start	end	duration	location	age	sex	country	occup	instit	field	site	outcome	failure	nopapsub	subdatep1	totsubp1	statusp1	pubdatep1	pubnamep1	pubtypep1	discatp1	lmicp1	accessp1	costp1	jifp1	whop1	artview	artdownloa	gogscholci	dingentap1	subdatep2	totsubp2	statusp2	pubdatep2	pubnamep2	pubtypep2	discatp2	lmicp2	accessp2	costp2	jifp2	whop2	artview1	artdownlo1	gogscholc1	dingentap2	subdatep3	totsubp3
1	1	2009-08-03	2010-03-05	7.1	1	31	2	22	7	5	10	2	1		1	2009-08-18	1	3	2009-11-26	1	1	2	1	4		2.8	1	0	0	26	333	2015-07-03
2	1	2009-08-03	2010-03-05	7.1	1	43	1	56	1	1	10	1	1		2	2010-01-13	1	3	2010-03-30	1	1	2	1	4		2.8	1	0	0	8	206	2010-04-05	1	3	2012-01-27	6	1	2	1	1	1000	0	1	2047	0	1
3	1	2009-08-03	2010-03-05	7.1	1	33	1	24	5	4	11	1	1		2	2010-04-05	1	3	2010-06-15	2	1	13	1	3		2.3	1	0	0	51	0	2011-06-28	1	3	2011-12-14	4	1	2	1	1	1215	3.5	1	3001	274	3	0
4	1	2009-08-03	2010-03-05	7.1	1	36	2	55	1	2	10	1	1		1	2010-04-05	1	3	2010-06-21	1	1	2	1	4		2.8	1	56	46	10	157
5	1	2009-08-03	2010-03-05	7.1	1	38	1	45	1	2	1	1	1		2	2010-03-15	1	3	2010-06-29	1	1	2	1	4		2.8	1	175	178	12	244	2010-03-27	1	3	2010-10-12	4	1	2	1	1	1215	3.5	1	5337	21	26	0
6	1	2009-08-03	2010-03-05	7.1	1	47	1	23	1	6	11	1	1		1	2010-03-22	1	3	2010-08-05	1	1	2	1	4		2.8	1	90	57	3	195
7	1	2009-08-03	2010-03-05	7.1	1	34	1	21	1	3	1	1	1		1	2010-04-02	1	3	2010-10-02	3	1	2	1	4		2.5	1	0	0	18	0
8	1	2009-08-03	2010-03-05	7.1	1	41	2	46	1	4	10	4	1		1	2010-03-30	1	3	2011-05-15	1	1	2	1	4		2.8	1	0	0	16	302
9	1	2009-08-03	2010-03-05	7.1	1	34	2	22	11	5	3	2	1		1	2010-03-30	1	3	2010-11-15	5	1	13	1	1	1745	2.6	1	3424	0	11	0
10	1	2009-08-03	2010-03-05	7.1	1	41	2	29	1	5	11	4	1		1	2010-04-05	2	3	2011-12-10	3	1	2	1	4		2.5	1	0	0	2	0
11	1	2009-08-03	2010-03-05	7.1	1	34	1	48	1	4	2	2	1		1	2010-03-05	2	3	2013-12-20	9	1	2	1	1	1500	99.9	1	0	0	0	75
12	1	2009-08-03	2010-03-05	7.1	1	34	1	59	1	3	10	2	2	1	0								1
13	2	2010-06-07	2011-03-11	9.2	2	99	1	45	11	5	2	4	1		1	2011-04-11	2	3	2012-11-09	4	1	2	1	1	1215	3.5	1	1701	10	0	0
14	2	2010-06-07	2011-03-11	9.2	2	41	1	45	1	4	10	3	1		1	2011-04-11	1	4					1
15	2	2010-06-07	2011-03-11	9.2	2	37	1	45	1	4	2	4	1		1	2011-04-11	1	4					1
16	2	2010-06-07	2011-03-11	9.2	2	45	1	45	1	4	2	1	1		1	2011-04-11	2	3	2011-12-13	7	1	2	1	1	1745	2.3	1	3098	0	6	0
17	2	2010-06-07	2011-03-11	9.2	2	38	1	45	1	2	10	2	1		1	2011-04-11	2	3	2011-10-11	4	1	2	1	1	1215	3.5	1	1926	31	6	0
18	2	2010-06-07	2011-03-11	9.2	2	99	1	45	1	2	2	4	1		1	2011-04-11	1	4					1
19	2	2010-06-07	2011-03-11	9.2	2	38	2	45	1	5	2	4	1		1	2011-04-11	1	3	2012-10-22	10	1	16	1	4		0.8	1	0	0	1	0
20	2	2010-06-07	2011-03-11	9.2	2	32	1	45	1	1	10	3	1		1	2011-04-11	1	3	2012-01-17	4	1	2	1	1	1215	3.5	1	2621	16	4	0
21	2	2010-06-07	2011-03-11	9.2	2	34	1	45	13	5	2	4	2	3	0			4					1
22	2	2010-06-07	2011-03-11	9.2	2	99	1	45	10	5	3	1	2	2	0								1
23	3	2010-08-30	2011-05-13	8.5	1	44	1	45	1	2	10	1	1		1	2011-07-01	1	3	2011-11-02	4	1	2	1	1	1215	3.5	1	2646	58	16	0
24	3	2010-08-30	2011-05-13	8.5	1	38	1	45	1	3	1	2	1		1	2011-06-08	1	3	2011-09-08	4	1	13	1	1	1215	3.5	1	2811	30	3	5
25	3	2010-08-30	2011-05-13	8.5	1	38	2	47	1	2	10	1	1		1	2011-06-06	1	3	2011-10-21	9	1	2	1	1	1500	99.9	1	0	0	6	183
26	3	2010-08-30	2011-05-13	8.5	1	50	1	30	1	1	10	1	1		1	2011-06-13	2	3	2012-08-15	3	1	2	1	4		2.5	1	135	73	6	0
27	3	2010-08-30	2011-05-13	8.5	1	27	2	22	1	5	10	3	1		1	2011-06-16	1	3	2011-10-21	9	1	2	1	1	1500	99.9	1	0	0	6	183
28	3	2010-08-30	2011-05-13	8.5	1	41	1	23	1	3	3	2	1		1	2011-06-09	1	3	2011-10-21	9	1	4	1	1	1500	99.9	1	0	0	3	162
29	3	2010-08-30	2011-05-13	8.5	1	46	1	12	1	2	10	1	1		1	2011-06-13	2	3	2012-03-21	4	1	13	1	1	1215	3.5	1	2505	19	18	0
30	3	2010-08-30	2011-05-13	8.5	1	31	1	25	5	1	10	1	1		2	2011-05-25	1	3	2011-12-21	9	1	2	1	1	1500	99.9	1	0	0	2	222	2011-08-24	1	3	2012-02-24	7	1	2	1	1	1745	2.3	1	3584	0	9	0
31	3	2010-08-30	2011-05-13	8.5	1	40	2	24	4	3	10	2	1		1	2011-06-08	1	3	2011-09-21	9	1	2	1	1	1500	99.9	1	0	0	3	308
32	3	2010-08-30	2011-05-13	8.5	1	37	2	21	1	5	1	1	1		1	2011-06-07	1	3	2011-12-21	9	1	2	1	1	1500	99.9	1	0	0	4	217
33	3	2010-08-30	2011-05-13	8.5	1	33	1	24	5	4	3	2	1		1	2011-06-11	1	3	2011-09-21	9	1	23	1	1	1500	99.9	1	0	0	8	173
34	3	2010-08-30	2011-05-13	8.5	1	43	1	25	3	1	10	1	1		1	2011-06-13	2	3	2012-08-01	11	1	2	1	4		1.1	1	0	0	1	0
35	4	2011-08-01	2012-06-08	10.4	1	47	1	59	1	3	10	1	1		1	2012-07-01	1	3	2012-09-21	9	1	2	1	1	1500	99.9	1	0	0	0	127
36	4	2011-08-01	2012-06-08	10.4	1	38	1	45	1	2	10	2	1		1	2012-07-08	1	3	2012-09-27	4	1	2	1	1	1215	3.5	1	1705	13	2	0
37	4	2011-08-01	2012-06-08	10.4	1	46	1	24	3	2	10	1	1		2	2011-11-08	1	3	2012-01-11	9	1	2	1	1	1500	99.9	1	0	0	3	225	2012-07-02	1	3	2012-12-21	9	1	13	1	1	1500	99.9	1	0	0	1	151
38	4	2011-08-01	2012-06-08	10.4	1	35	1	72	7	5	1	1	1		1	2012-07-07	1	3	2012-12-21	9	1	2	1	1	1500	99.9	1	0	0	1	126
39	4	2011-08-01	2012-06-08	10.4	1	43	2	65	4	1	1	1	1		1	2012-01-12	1	3	2012-10-30	9	1	2	1	1	1500	99.9	1	0	0	1	175
40	4	2011-08-01	2012-06-08	10.4	1	29	1	13	7	5	10	1	1		1	2012-07-07	1	3	2012-12-21	9	1	2	1	1	1500	99.9	1	0	0	2	130
41	4	2011-08-01	2012-06-08	10.4	1	32	1	21	1	6	15	2	1		1	2012-07-05	1	3	2012-12-21	9	1	15	1	1	1500	99.9	1	0	0	1	99
42	4	2011-08-01	2012-06-08	10.4	1	45	1	45	11	3	3	1	1		1	2012-06-01	1	3	2012-12-10	12	1	32	1	4		0.9	1	0	0	10	0
43	4	2011-08-01	2012-06-08	10.4	1	33	2	22	7	5	1	2	1		2	2012-02-02	1	3	2012-10-11	5	1	11	1	1	1745	2.6	1	3656	0	3	0	2012-12-12	1	3	2013-12-10	4	1	2	1	1	1215	3.5	1	1456	8	1	0
500	4	2011-08-01	2012-06-08	10.4	1	51	1	73	1	3	1	1	1		1	2011-10-14	1	3	2012-06-15	1	1	2	2	4		2.8	1	0	0	23	1092
44	4	2011-08-01	2012-06-08	10.4	1	33	1	24	3	3	3	2	1		1	2012-07-07	1	3	2013-05-30	2	1	23	1	2		2.3	1	0	0	2	0
45	4	2011-08-01	2012-06-08	10.4	1	45	1	45	5	3	3	1	2	3	0								1
46	5	2011-07-25	2012-06-11	10.7	3	36	2	42	7	3	1	1	1		1	2012-07-10	1	3	2012-08-12	2	1	34	2	2		2.3	1	0	0	8
47	5	2011-07-25	2012-06-11	10.7	3	38	1	45	5	2	10	2	1		1	2012-07-10	2	3	2012-12-05	4	1	2	1	1	1215	3.5	1	1776	16	3
48	5	2011-07-25	2012-06-11	10.7	3	37	1	46	6	3	5	4	1		1	2012-07-13	1	3	2012-12-21	9	1	16	1	1	1500	99.9	1			4	102
49	5	2011-07-25	2012-06-11	10.7	3	52	1	42	5	1	12	1	1		1	2012-07-13	1	3	2012-12-21	9	1	4	1	1	1500	99.9	1			0	68
50	5	2011-07-25	2012-06-11	10.7	3	53	2	32	4	3	6	2	1		1	2012-07-11	1	3	2012-12-21	9	1	36	2	1	1500	99.9	1			5	114
51	5	2011-07-25	2012-06-11	10.7	3	50	2	27	4	3	6	3	1		1	2012-07-10	1	3	2012-12-21	9	1	36	2	1	1500	99.9	1			2	88
52	5	2011-07-25	2012-06-11	10.7	3	35	2	46	1	3	1	1	1		1	2012-07-11	1	3	2012-12-21	9	1	16	1	1	1500	99.9	1			2	76
53	5	2011-07-25	2012-06-11	10.7	3	40	1	58	1	5	11	3	1		1	2012-07-11	1	3	2013-01-07	2	1	13	1	2		2.3	1		0	3
54	5	2011-07-25	2012-06-11	10.7	3	35	2	41	10	3	9	1	1		1	2012-10-05	1	3	2013-06-21	9	1	35	1	1	1500	99.9	1			2	210
55	5	2011-07-25	2012-06-11	10.7	3	47	2	32	1	3	5	1	1		1	2012-07-11	2	3	2013-12-21	9	1	35	2	1	1500	99.9	1			0	136
56	5	2011-07-25	2012-06-11	10.7	3	45	2	33	1	1	3	1	1		1	2012-07-11	2	3	2014-01-23	3	1	13	2	3		2.5	1		0	0
57	5	2011-07-25	2012-06-11	10.7	3	55	1	41	6	3	1	3	2	4	0								1
58	6	2011-09-26	2012-08-31	11.3	4	34	1	72	11	1	10	1	1		2	2012-12-01	2	3	2013-05-16	3	1	2	1	4		2.5	1		0	2		2012-09-12	1	3	2012-12-12	9	1	2	1	1	1500	99.9	1			5	160
59	6	2011-09-26	2012-08-31	11.3	4	99	2	72	7	2	10	1	1		1	2012-09-21	1	3	2012-12-21	9	1	2	1	1	1500	99.9	1			3	129
60	6	2011-09-26	2012-08-31	11.3	4	43	2	72	9	1	1	1	1		1	2012-10-01	1	3	2013-03-21	9	1	36	1	1	1500	99.9	1			1	72
61	6	2011-09-26	2012-08-31	11.3	4	99	2	72	12	1	3	1	1		1	2012-09-30	1	3	2013-03-21	9	1	17	1	1	1500	99.9	1			1	93
62	6	2011-09-26	2012-08-31	11.3	4	33	2	72	1	1	3	1	1		1	2012-09-25	1	3	2013-01-15	13	1	35	1	1	725	99.9	1		0	1
63	6	2011-09-26	2012-08-31	11.3	4	99	1	72	9	5	14	1	1		1	2012-09-27	1	3	2013-02-08	9	1	16	1	1	1500	99.9	1			2	116
64	6	2011-09-26	2012-08-31	11.3	4	56	2	72	5	1	3	1	1		1	2012-08-30	2	3	2014-03-21	9	1	2	1	1	1500	99.9	1			0	223
65	6	2011-09-26	2012-08-31	11.3	4	99	2	72	4	5	3	1	1		1	2012-09-30	1	3	2013-03-21	9	1	33	1	1	1500	99.9	1			1	74
66	6	2011-09-26	2012-08-31	11.3	4	99	1	72	1	1	10	1	1		1	2012-09-30	2	1					1				1
67	6	2011-09-26	2012-08-31	11.3	4	45	1	72	1	2	3	5	2	2	0			4					1
68	6	2011-09-26	2012-08-31	11.3	4	99	2	72	7	2	10	1	2	3	0								1
69	6	2011-09-26	2012-08-31	11.3	4	43	1	72	16	2	11	3	2	2	0								1
70	7	2012-02-20	2012-10-26	8.3	5	32	1	50	5	1	10	1	1		1	2012-11-16	1	3	2013-03-21	9	1	2	1	1	1500	99.9	1			1	332
71	7	2012-02-20	2012-10-26	8.3	5	30	1	50	3	1	10	1	1		1	2012-11-24	1	3	2013-03-21	9	1	2	1	1	1500	99.9	1			5	492
72	7	2012-02-20	2012-10-26	8.3	5	36	2	46	1	4	2	2	1		1	2012-11-26	2	3	2013-06-19	11	1	2	1	4		1.1	1		0	3
73	7	2012-02-20	2012-10-26	8.3	5	46	2	51	1	2	10	2	1		1	2012-11-24	1	3	2013-03-21	9	1	2	1	1	1500	99.9	1			4	378
74	7	2012-02-20	2012-10-26	8.3	5	31	2	45	5	2	3	1	1		1	2012-11-22	1	3	2013-03-22	7	1	32	1	1	1745	2.3	1	2680	2	13
75	7	2012-02-20	2012-10-26	8.3	5	40	1	45	1	2	11	2	1		2	2012-11-23	1	3	2013-08-27	14	1	13	1	1	2031	3.3	1		1	5		2013-04-30	1	3	2013-08-08	4	1	13	1	1	1215	3.5	1	1047	13	2
76	7	2012-02-20	2012-10-26	8.3	5	41	1	49	3	1	3	1	1		1	2012-11-05	1	3	2013-03-21	9	1	23	1	1	1500	99.9	1			1	111
77	7	2012-02-20	2012-10-26	8.3	5	32	1	58	1	1	10	1	1		1	2012-12-07	1	3	2013-04-25	4	1	2	1	1	1215	3.5	1	1891	16	13
78	7	2012-02-20	2012-10-26	8.3	5	33	2	47	1	1	10	1	1		1	2012-11-05	1	3	2013-03-21	9	1	2	1	1	1500	99.9	1			2	509
79	7	2012-02-20	2012-10-26	8.3	5	36	2	45	1	2	10	2	1		1	2012-11-20	2	3	2013-07-08	4	1	2	1	1	1215	3.5	1	1875	14	8
80	7	2012-02-20	2012-10-26	8.3	5	30	1	64	3	5	3	1	1		1	2012-11-26	1	4					1
81	7	2012-02-20	2012-10-26	8.3	5	37	1	63	3	2	10	1	2	6	0								1
504	8	2012-03-21	2012-11-30	8.5	6	50	1	73	1	3	1	1	1		2	2013-02-14		3	2013-06-21	2	2	23	2	2		2.3	1		0	7		2013-12-15	1	3	2014-01-15	2	2	29	2	2		2.3	1	0	0	0
503	7	2012-02-20	2012-10-26	8.3	5	38	1	45	1	3	1	1	1		1	2013-01-11	1	3	2013-03-21	9	1	23	1	1	1500	99.9	1			3	181
82	8	2012-03-21	2012-11-30	8.5	6	41	2	29	3	3	10	1	1		1	2012-12-29	1	3	2013-07-02	9	1	2	1	1	1500	99.9	1			0	140
83	8	2012-03-21	2012-11-30	8.5	6	33	2	22	7	3	11	4	1		1	2013-03-13	1	3	2013-07-04	14	1	13	1	1	2031	3.3	1		0	12
84	8	2012-03-21	2012-11-30	8.5	6	49	1	40	3	3	3	3	1		1	2012-12-21	1	3	2013-06-21	9	1	35	1	1	1500	99.9	1			1	79
85	8	2012-03-21	2012-11-30	8.5	6	39	1	24	3	3	11	2	1		1	2013-01-07	1	3	2013-06-21	9	1	17	1	1	1500	99.9	1			0	91
86	8	2012-03-21	2012-11-30	8.5	6	52	1	31	8	2	10	1	1		1	2012-12-27	1	3	2013-06-21	9	1	2	1	1	1500	99.9	1			6	124
87	8	2012-03-21	2012-11-30	8.5	6	33	1	32	1	3	8	2	1		1	2013-01-01	1	3	2013-06-21	9	1	1	1	1	1500	99.9	1			1	78
88	8	2012-03-21	2012-11-30	8.5	6	47	1	41	1	3	13	2	1		1	2013-10-10	2	3	2014-02-20	3	1	14	2	4		2.5	1			2
89	8	2012-03-21	2012-11-30	8.5	6	41	1	25	3	2	10	2	1		1	2013-01-06	1	3	2013-06-21	9	1	2	1	1	1500	99.9	1			0	141
90	8	2012-03-21	2012-11-30	8.5	6	53	1	21	1	3	4	5	1		1	2013-01-24	1	3	2013-06-21	9	1	34	2	1	1500	99.9	1			1	126
91	8	2012-03-21	2012-11-30	8.5	6	35	1	21	3	3	11	5	1		1	2014-01-01	1	1					1	1			1
92	8	2012-03-21	2012-11-30	8.5	6	54	2	21	1	3	15	5	1		1	2012-11-17	1	3	2013-10-13	2	1	1	2	4		2.3	1		0	2
93	8	2012-03-21	2012-11-30	8.5	6	29	1	24	8	3	11	2	2	7	1	2013-05-01	1	3	2013-10-11	15	1	13	1	4		4.4	1		0	6
94	9	2012-09-10	2013-05-13	8.2	7	33	1	45	1	2	10	1	1		1	2012-10-10	1	1					1
95	9	2012-09-10	2013-05-17	8.3	7	32	1	45	1	5	2	1	1		1	2013-06-11	1	3	2013-09-21	9	1	2	1	1	1500	99.9	1			3	106
96	9	2012-09-10	2013-05-17	8.3	7	41	1	45	1	2	10	2	1		1	2013-06-15	1	3	2013-12-21	9	1	1	1	1	1500	99.9	1			0	103
97	9	2012-09-10	2013-05-17	8.3	7	51	1	45	1	2	10	2	1		1	2013-06-12	1	3	2013-10-14	4	1	2	1	1	1215	3.5	1	2266	12	4
98	9	2012-09-10	2013-05-17	8.3	7	47	1	45	1	2	10	2	1		1	2013-06-11	1	3	2013-09-21	9	1	2	1	1	1500	99.9	1			2	129
99	9	2012-09-10	2013-05-17	8.3	7	30	1	45	11	3	10	2	1		1	2013-06-17	1	3	2013-10-09	4	1	2	1	1	1215	3.5	1	1942	15	7
100	9	2012-09-10	2013-05-17	8.3	7	35	1	45	1	2	10	2	1		2	2013-06-14	1	3	2013-09-23	4	1	2	1	1	1215	3.5	1	1194	8	4		2013-11-24	1	3	2014-06-15	1	1	2	1	4		2.8	1			1	108
101	9	2012-09-10	2013-05-17	8.3	7	41	1	45	7	5	3	1	1		2	2013-06-16	1	3	2014-04-15	1	1	2	1	4		2.8	1			0	189	2013-06-17	1	3	2013-09-14	9	1	2	1	1	1500	99.9	1			0	189
102	9	2012-09-10	2013-05-17	8.3	7	31	1	45	1	5	1	1	1		1	2013-06-13	1	3	2013-09-21	9	1	1	1	1	1500	99.9	1			1	89
103	9	2012-09-10	2013-05-17	8.3	7	31	2	45	1	2	10	1	1		1	2013-06-17	1	3	2013-10-11	4	1	2	1	1	1215	3.5	1	1010	3	5
104	9	2012-09-10	2013-05-17	8.3	7	31	1	45	1	2	11	1	2	6	0								1
105	9	2012-09-10	2013-05-17	8.3	7	38	1	45	4	2	3	2	2	6	0								2
106	10	2012-07-02	2013-06-15	11.6	3	39	2	12	1	3	13	2	1		1	2012-08-02	1	1			1	7	1
107	10	2012-07-02	2013-06-15	11.6	3	36	1	46	1	3	13	2	1		1	2013-07-14	1	3	2014-04-15	9	1	5	1	1	1500	99.9	1			0	126
108	10	2012-07-02	2013-06-15	11.6	3	32	1	45	1	5	14	1	1		1	2013-07-11	1	3	2013-12-21	9	1	16	1	1	1500	99.9	1			0	126
109	10	2012-07-02	2013-06-15	11.6	3	39	1	40	1	5	5	3	1		1	2013-08-19	1	3	2014-01-14	11	1	33	1	1	3000	1.3	1	61	63	0
110	10	2012-07-02	2013-06-15	11.6	3	52	1	21	5	3	3	1	1		1	2013-08-08	1	3	2014-04-03	4	1	4	2	1	1215	3.5	1	1372	10	0
111	10	2012-07-02	2013-06-15	11.6	3	32	2	36	5	7	3	2	1		1	2013-07-06	1	3	2014-11-05	8	1	23	2	1	1745	1.7	1	1086	0	1
112	10	2012-07-02	2013-06-15	11.6	3	51	2	45	1	5	10	1	1		1	2013-10-16	1	3	2014-07-24	4	1	2	1	1	1215	3.5	1	751	5	4
113	10	2012-07-02	2013-06-15	11.6	3	33	2	21	1	5	16	5	1		1	2013-07-14	1	3	2013-12-21	9	1	17	1	1	1500	99.9	1			0	72
114	10	2012-07-02	2013-06-15	11.6	3	40	2	45	1	2	10	1	1		1	2013-07-14	1	3	2013-11-05	3	1	2	1	3		2.5	1		0	3
115	10	2012-07-02	2013-06-15	11.6	3	38	2	37	1	3	13	2	1		1	2013-08-02	1	3	2014-02-15	2	1	5	1	1	1871	2.3	1		0	3
116	10	2012-07-02	2013-06-15	11.6	3	37	2	27	1	3	3	3	1		1	2013-07-16	1	3	2014-11-06	8	1	33	1	1	1745	1.7	1	2154	0	0
117	10	2012-07-02	2013-06-15	11.6	3	53	1	34	1	3	11	1	2	3	0
118	11	2012-07-09	2013-06-07	11.1	1	31	1	26	1	2	10	1	1		3	2012-12-14	1	3	2013-03-29	9	1	2	1	1	1500	99.9	1			3	357	2012-12-14	1	3	2013-06-21	9	1	2	1	1	1500	99.9	1			0	116	2013-07-06	1
119	11	2012-07-09	2013-06-07	11.1	1	43	2	55	1	2	10	1	1		2	2013-07-06		3	2013-11-15	2	1	15	1	4		2.3	1		0	10		2014-02-26	2	3	2014-05-19	16	1	15	1	1	1250	1.9	1
120	11	2012-07-09	2013-06-07	11.1	1	40	2	46	11	2	3	1	1		1	2013-06-26	1	3	2013-09-21	9	1	32	1	1	1500	99.9	1			4	120
121	11	2012-07-09	2013-06-07	11.1	1	33	1	54	1	2	10	1	1		1	2013-07-07	1	3	2013-12-21	9	1	2	1	1	1500	99.9	1			1	85
122	11	2012-07-09	2013-06-07	11.1	1	41	1	45	11	4	14	2	1		1	2013-07-04	1	3	2013-12-16	4	1	16	1	1	1215	3.5	1	1237	13	6
123	11	2012-07-09	2013-06-07	11.1	1	33	2	57	1	2	10	1	1		1	2013-07-24	1	3	2013-12-02	9	1	2	1	1	1500	99.9	1			0	109
124	11	2012-07-09	2013-06-07	11.1	1	44	2	25	1	2	6	3	1		1	2013-07-04	1	3	2013-12-21	9	1	36	1	1	1500	99.9	1			0	107
125	11	2012-07-09	2013-06-07	11.1	1	32	1	21	1	3	3	2	1		1	2013-07-06	2	3	2015-03-21	9	1	2	1	1	1500	99.9	1			0	68
126	11	2012-07-09	2013-06-07	11.1	1	43	2	21	1	1	3	3	1		1	2013-07-24	1	3	2013-12-21	9	1	1	1	1	1500	99.9	1			2	107
127	11	2012-07-09	2013-06-07	11.1	1	31	2	22	1	2	11	2	1		1	2013-03-06	1	3	2013-05-22	4	1	13	1	1	1215	3.5	1	1296	14	8
128	11	2012-07-09	2013-06-07	11.1	1	33	1	23	1	2	10	1	1		1	2014-04-08	1	3	2014-08-08	4	1	2	1	1	1215	3.5	1	1311	13	6
129	11	2012-07-09	2013-06-07	11.1	1	33	1	24	3	3	6	2	2	6	0								1
505	11	2012-07-09	2013-06-07	11.1	1	65	1	73	1	3	1	1	1		1	2013-07-31	1	3	2013-09-21	9	2	23	2	1	1500	99.9	1			0	202
130	12	2012-09-03	2013-08-05	11.2	4	51	2	66	9	1	15	1	1		1	2013-09-06	1	3	2014-06-21	9	1	15	1	1	1500	99.9	1			0	35
131	12	2012-09-03	2013-08-05	11.2	4	50	2	65	4	5	15	1	1		1	2013-08-08	1	3	2013-11-08	9	1	15	1	1	1500	99.9	1			0	46
132	12	2012-09-03	2013-08-05	11.2	4	37	2	67	1	1	15	1	1		1	2013-09-07	1	3	2014-06-21	9	1	15	1	1	1500	99.9	1			2	67
133	12	2012-09-03	2013-08-05	11.2	4	50	1	68	1	1	15	3	1		1	2013-09-07	1	3	2014-06-21	9	1	1	1	1	1500	99.9	1			2	87
134	12	2012-09-03	2013-08-05	11.2	4	45	2	69	4	1	15	2	1		1	2013-09-07	1	3	2014-06-21	9	1	1	1	1	150	99.9	1			0	112
135	12	2012-09-03	2013-08-05	11.2	4	52	1	70	4	1	10	1	1		1	2013-09-22	1	3	2014-06-21	9	1	2	1	1	1500	99.9	1			0	74
136	12	2012-09-03	2013-08-05	11.2	4	40	1	71	4	5	10	1	1		1	2013-09-08	1	3	2014-06-21	9	1	2	1	1	1500	99.9	1			0	112
137	12	2012-09-03	2013-08-05	11.2	4	35	1	71	4	2	10	1	1		1	2013-09-02	1	3	2014-06-21	9	1	2	1	1	1500	99.9	1			1	97
138	12	2012-09-03	2013-08-05	11.2	4	51	1	68	1	1	10	1	2	6	0								1
139	12	2012-09-03	2013-08-05	11.2	4	37	2	68	4	1	10	1	2	5	0								1
140	12	2012-09-03	2013-08-05	11.2	4	57	1	70	1	1	10	1	2	8	0								1
141	12	2012-09-03	2013-08-05	11.2	4	40	2	67	1	1	10	3	2	7	1	2013-09-22	1	2
506	12	2012-09-03	2013-08-05	11.2	4	65	1	73	1	3	1	1	1		1	2013-08-29	1	3	2014-06-21	9	2	23	2	1	1500	99.9	1			0	112
507	12	2012-09-03	2013-08-05	11.2	4	52	2	73	11	5	3	1	1		1	2013-09-05	1	3	2014-06-21	9	2	23	2	1	1500	99.9	1			4	120
508	12	2012-09-03	2013-08-05	11.2	4	99	1	73	1	5	1	1	1		1	2013-09-04	1	3	2014-06-21	9	1	23	1	1	1500	99.9	1			0	131
142	13	2013-02-18	2013-11-22	9.2	5	43	1	49	5	1	10	1	1		1	2013-12-17	1	3	2014-03-21	9	1	2	1	1	1500	99.9	1			0	84
143	13	2013-02-18	2013-11-22	9.2	5	39	1	45	11	2	3	1	1		1	2013-12-23	1	3	2014-05-29	11	1	32	1	4		1.3	1	59	47	1
144	13	2013-02-18	2013-11-22	9.2	5	31	2	55	7	5	10	1	1		1	2013-12-23	1	3	2014-05-25	3	1	2	1	4		2.5	1		0	1
145	13	2013-02-18	2013-11-22	9.2	5	38	2	55	7	5	11	5	1		1	2013-12-03	1	3	2014-01-07	9	1	13	1	1	1500	99.9	1			1	101
146	13	2013-02-18	2013-11-22	9.2	5	33	1	45	1	2	11	2	1		1	2013-12-21	2	3	2014-07-08	9	1	13	1	1	1500	99.9	1			1	124
147	13	2013-02-18	2013-11-22	9.2	5	33	1	50	11	1	11	1	1		1	2013-12-21	1	3	2014-03-21	9	1	13	1	1	1500	99.9	1			1	112
148	13	2013-02-18	2013-11-22	9.2	5	34	1	46	7	1	3	1	1		1	2013-12-21	1	1				32	1
149	13	2013-02-18	2013-11-22	9.2	5	34	1	51	1	2	10	2	1		1	2013-12-22	1	3	2014-06-21	9	1	2	1	1	1500	99.9	1			3	159
150	13	2013-02-18	2013-11-22	9.2	5	30	2	45	1	3	3	5	1		2	2013-12-21	2	3	2014-09-09	16	1	2	1	1	1250	1.9	1		0	1		2013-12-21	2	1
151	13	2013-02-18	2013-11-22	9.2	5	30	2	2	1	4	11	1	1		1	2013-12-26	1	3	2014-06-21	9	1	33	1	1	1500	99.9	1			1	191
152	13	2013-02-18	2013-11-22	9.2	5	30	2	47	7	2	3	1	2	9	0								1
153	13	2013-02-18	2013-11-22	9.2	5	57	2	45	7	5	15	3	1		2	2013-05-24	1	3	2013-11-04	9	1	15	1	1	1500	99.9	1			6	221	2013-12-21	1	1
509	13	2013-02-18	2013-11-22	9.2	5	34	1	45	1	3	1	1	1		1	2014-03-13	1	3	2014-11-19	6	2	23	1	1	1745	99.9	1	461	0	0
154	14	2013-03-11	2013-12-02	8.9	8	53	1	21	1	3	1	5	1		2	2014-01-02	2	3	2014-06-21	9	1	35	1	1	1500	99.9	1			1	109	2014-12-02	1	3	2015-05-21	3	1	15	2	3		2.5	1
155	14	2013-03-11	2013-12-02	8.9	8	36	2	21	1	1	3	2	1		1	2013-12-07	1	3	2014-02-06	1	1	1	1	1	1500	99.9	1			0	176
156	14	2013-03-11	2013-12-02	8.9	8	32	2	47	1	3	1	2	1		2	2014-01-28	1	3	2014-06-25	4	1	33	1	1	1215	3.5	1	1886	5	1		2013-02-15	1	3	2013-07-24	17	2	29	1	4		3.5	1		0	1
157	14	2013-03-11	2013-12-02	8.9	8	36	1	24	1	3	11	2	1		1	2014-01-10	1	3	2014-06-21	9	1	13	1	1	1500	99.9	1			2	206
158	14	2013-03-11	2013-12-02	8.9	8	37	2	32	1	1	5	3	1		1	2014-01-02	1	1					1				1
159	14	2013-03-11	2013-12-02	8.9	8	38	1	38	1	3	11	3	1		1	2014-01-06	1	3	2014-04-08	16	1	13	1	1	1250	1.9	1		0	5
160	14	2013-03-11	2013-12-02	8.9	8	40	1	35	1	3	11	1	1		1	2013-01-01	2	3	2014-10-01	15	1	13	2	4		4.4	1		0	1
161	14	2013-03-11	2013-12-02	8.9	8	32	2	37	1	2	3	1	1		1	2014-01-19	1	3	2014-06-21	9	1	23	1	1	1500	99.9	1			0	167
162	14	2013-03-11	2013-12-02	8.9	8	29	1	28	3	3	3	2	1		1	2014-01-01	2	3	2014-12-21	9	1	28	1	1	1500	99.9	1			0	100
163	14	2013-03-11	2013-12-02	8.9	8	33	1	28	1	3	8	2	1		1	2014-01-13	1	3	2014-06-21	9	1	37	1	1	1500	99.9	1			1	158
164	14	2013-03-11	2013-12-02	8.9	8	34	1	39	1	2	10	1	1		2	2014-01-03	1	3	2014-04-10	4	1	2	1	1	1215	3.5	1	1554	10	2		2014-05-16	1	3	2014-09-21	9	2	30	1	1	1500	99.9	1			0	243
165	14	2013-03-11	2013-12-02	8.9	8	52	1	23	1	5	5	1	1		1	2014-01-01	2	3	2015-01-28	18	1	35	1	1	163	99.9	1	413	0
510	14	2013-03-11	2013-12-02	8.9	8	33	1	73	5	3	1	1	1		1	2013-04-11	1	3	2013-06-21	9	2	22	2	1	1500	99.9	1			1	191
501	14	2013-03-11	2013-12-02	8.9	8	51	1	73	1	3	1	1	1		1	2014-03-11	1	3	2014-09-21	9	2	28	2	1	1500	99.9	1			0	197
166	15	2013-05-20	2014-02-07	8.8	4	31	1	72	1	1	6	1	1		1	2014-03-06	2	3	2014-10-27	9	1	13	1	1	1500	99.9	1		0	0
167	15	2013-05-20	2014-02-07	8.8	4	29	1	72	11	1	15	1	1		1	2014-03-09	1	3	2014-09-21	9	1	15	1	1	1500	99.9	1			0	71
168	15	2013-05-20	2014-02-07	8.8	4	28	2	72	8	2	10	1	1		1	2014-03-14	1	3	2014-09-21	9	1	2	1	1	1500	99.9	1			0	106
169	15	2013-05-20	2014-02-07	8.8	4	54	2	72	4	5	15	1	1		1	2014-03-06	1	3	2014-09-21	9	1	15	1	1	1500	99.9	1			0	130
170	15	2013-05-20	2014-02-07	8.8	4	99	1	72	4	5	5	3	1		1	2014-03-06		1					1
171	15	2013-05-20	2014-02-07	8.8	4	61	2	72	4	5	3	2	1		1	2014-03-10	1	3	2014-09-21	9	1	33	1	1	1500	99.9	1			0	63
172	15	2013-05-20	2014-02-07	8.8	4	99	1	72	4	1	10	1	1		1	2014-03-06	1	3	2014-09-21	9	1	2	1	1	1500	99.9	1			0	53
173	15	2013-05-20	2014-02-07	8.8	4	37	2	72	4	5	3	3	1		1	2014-03-06	1	3	2014-09-17	13	1	38	1	1	725	99.9	1		0	2
174	15	2013-05-20	2014-02-07	8.8	4	29	2	72	10	1	10	1	1		1	2014-03-07	1	3	2014-09-21	9	1	2	1	1	1500	99.9	1			0	56
175	15	2013-05-20	2014-02-07	8.8	4	32	1	72	4	1	10	1	1		1	2014-03-04	1	3	2014-09-21	9	1	2	1	1	1500	99.9	1			0	62
176	15	2013-05-20	2014-02-07	8.8	4	99	2	72	4	1	10	1	1		1	2014-03-06	2	3	2014-09-21	9	1	2	1	1	1500	99.9	1	111	342	0
177	15	2013-05-20	2014-02-07	8.8	4	99	2	72	1	1	3	1	1		1	2014-03-06	1	3	2014-10-17	19	1	38	1	4		0.5	1	111	342	0
178	16	2013-05-06	2014-04-05	11.1	9	42	2	8	5	2	10	1	1		1	2014-05-05	1	3	2014-10-21	9	1	2	1	1	1500	99.9	1			1	95
179	16	2013-05-06	2014-04-05	11.1	9	30	1	5	7	1	10	1	1		1	2014-05-05	1	3	2014-10-21	9	1	2	1	1	1500	99.9	1			1	98
180	16	2013-05-06	2014-04-05	11.1	9	43	1	5	1	1	10	3	1		1	2014-05-02	1	3	2014-10-21	9	1	2	1	1	1500	99.9	1			1	85
181	16	2013-05-06	2014-04-05	11.1	9	47	2	4	1	1	10	1	1		1	2014-04-30	1	3	2014-10-21	9	1	2	1	1	1500	99.9	1			1	88
182	16	2013-05-06	2014-04-05	11.1	9	47	2	4	1	1	10	1	1		1	2014-04-30	1	3	2014-10-21	9	1	2	1	1	1500	99.9	1			2	62
183	16	2013-05-06	2014-04-05	11.1	9	29	2	3	8	5	10	1	1		1	2014-05-04	1	3	2014-10-21	9	1	2	2	1	1500	99.9	1			3	119
184	16	2013-05-06	2014-04-05	11.1	9	38	2	6	1	1	10	1	1		1	2014-05-05	1	3	2014-10-21	9	1	2	1	1	1500	99.9	2			1	107
185	16	2013-05-06	2014-04-05	11.1	9	38	2	6	1	2	10	1	1		1	2014-05-03	1	3	2014-10-21	9	1	2	1	1	1500	99.9	1			1	71
186	16	2013-05-06	2014-04-05	11.1	9	35	1	1	6	1	10	1	1		1	2014-05-05	1	3	2014-10-21	9	1	2	1	1	1500	99.9	1			1	89
187	16	2013-05-06	2014-04-05	11.1	9	32	1	7	5	1	3	1	1		1	2014-04-25	1	3	2014-10-21	1	1	23	1	1	1500	99.9	1			1	99
188	16	2013-05-06	2014-04-05	11.1	9	39	2	2	1	2	10	3	1		1	2014-04-11	1	3	2014-10-21	9	1	2	1	1	1500	99.9	1			2	100
511	16	2013-05-06	2014-04-05	11.1	9	99	2	73	6	7	1	1	1		1	2014-08-23	1	3	2014-10-01	9	2	2	2	1	1500	99.9	1			3	208
512	16	2013-05-06	2014-04-05	11.1	9	99	2	73	6	6	10	1	1		1	2014-05-04	1	3	2014-10-21	9	2	2	2	1	1500	99.9	1			1	212
189	17	2013-07-08	2014-06-06	11.1	3	29	2	24	5	3	3	2	1		1	2014-06-20	2	3	2014-12-21	9	1	23	1	1	1500	99.9	1			0	123
190	17	2013-07-08	2014-06-06	11.1	3	51	2	21	1	1	6	3	1		1	2014-07-03	1	3	2015-03-21	9	1	36	1	1	1500	99.9	1			0	55
191	17	2013-07-08	2014-06-06	11.1	3	33	2	9	6	7	10	1	1		1	2014-07-06	1	3	2015-01-15	20	1	2	2	1	4500	99.9	1		0	4
192	17	2013-07-08	2014-06-06	11.1	3	36	2	32	4	3	6	1	1		1	2014-07-05	2	1					2				1
193	17	2013-07-08	2014-06-06	11.1	3	35	2	10	1	3	13	5	1		1	2014-07-05	1	1					2
194	17	2013-07-08	2014-06-06	11.1	3	44	1	5	1	1	10	1	1		1	2014-07-03		2
195	17	2013-07-08	2014-06-06	11.1	3	34	2	48	10	3	3	3	1		1	2014-09-30	1	3	2014-12-21	9	1	33	1	1	1500	99.9	1				111
196	17	2013-07-08	2014-06-06	11.1	3	44	2	7	16	1	10	1	1		1	2014-07-05		1					1
197	17	2013-07-08	2014-06-06	11.1	3	35	1	25	6	3	11	2	1		1	2014-07-05	2	3	2015-06-17	4	1	13	2	1	1215	3.5	1	598	94	0
198	17	2013-07-08	2014-06-06	11.1	3	53	1	39	10	4	9	1	1		1	2014-07-10	1	3	2015-03-17	4	1	2	1	1	1215	3.5	1	520	0	0
199	17	2013-07-08	2014-06-06	11.1	3	38	1	52	1	1	10	1	1		1	2014-07-15	1	3	2015-06-15	4	1	2	1	1	1215	3.5	1	488	104	0
200	17	2013-07-08	2014-06-06	11.1	3	40	2	12	1	5	3	3	1		1	2014-07-06	1	3	2015-02-01	21	1	38	2	4		2.3	1	87	19	0
513	17	2013-07-08	2014-06-06	11.1	3	65	1	73	1	3	1	1	1		1	2014-07-06	1	3	2014-09-21	9	2	29	2	1	1500	99.9	1			0	110
201	18	2013-09-30	2014-09-06	11.4	7	33	1	45	1	5	10	1	1		1	2014-10-05	1	2
202	18	2013-09-30	2014-09-06	11.4	7	49	2	45	1	1	10	2	1		1	2014-10-04	1	3	2015-04-24	4	1	2	1	1	1215	3.5	1
203	18	2013-09-30	2014-09-06	11.4	7	32	1	45	1	4	10	1	2	7	0								1
204	18	2013-09-30	2014-09-06	11.4	7	38	1	45	11	4	10	2	1		1	2014-10-03	2	1					1
205	18	2013-09-30	2014-09-06	11.4	7	27	1	45	16	5	10	1	1		1	2014-10-03	1	3	2015-04-30	4	1	2	1	1	1215	3.5	1	1181	117	0
206	18	2013-09-30	2014-09-06	11.4	7	36	1	45	1	2	10	2	2	7	0								1
207	18	2013-09-30	2014-09-06	11.4	7	30	1	45	1	5	10	2	1		1	2014-10-27	1	2					1
208	18	2013-09-30	2014-09-06	11.4	7	41	1	45	1	2	10	2	1		1	2014-10-27	1	3	2015-03-21	9	1	2	1	1	1500	99.9	1			0	56
209	18	2013-09-30	2014-09-06	11.4	7	34	1	45	1	2	10	2	1		1	2014-10-09	1	2
210	18	2013-09-30	2014-09-06	11.4	7	36	1	45	1	2	10	2	1		1	2014-10-05	2	1					1
211	18	2013-09-30	2014-09-06	11.4	7	36	2	45	1	1	11	1	1		1	2014-09-30	1	2
212	18	2013-09-30	2014-09-06	11.4	7	29	2	45	11	1	10	1	2	7	0								1
213	19	2014-03-03	2014-12-12	9.5	5	31	1	45	6	3	13	2	1		1	2015-01-11	2	2
214	19	2014-03-03	2014-12-12	9.5	5	38	1	51	11	1	10	2	1		1	2015-03-13	1	2
215	19	2014-03-03	2014-12-12	9.5	5	33	2	46	8	4	10	1	1		1	2014-01-11	1	2
216	19	2014-03-03	2014-12-12	9.5	5	30	1	59	1	3	11	1	1		1	2015-01-11	1	1					1
217	19	2014-03-03	2014-12-12	9.5	5	33	2	59	1	3	3	1	1		1	2015-01-11	1	1					1				1
218	19	2014-03-03	2014-12-12	9.5	5	29	1	49	11	3	10	1	1		1	2015-01-12	1	3	2015-06-21	9	1	2	1	1	1500	99.9	1
219	19	2014-03-03	2014-12-12	9.5	5	45	1	58	1	1	3	1	1		1	2015-01-11	1	1					1
220	19	2014-03-03	2014-12-12	9.5	5	45	1	45	11	4	2	3	1		1	2015-01-11	2	1					1
221	19	2014-03-03	2014-12-12	9.5	5	33	2	50	11	1	15	1	1		1	2015-01-11	1	1					1
222	19	2014-03-03	2014-12-12	9.5	5	32	1	59	1	3	10	1	1		1	2015-01-11	1	1					1
223	19	2014-03-03	2014-12-12	9.5	5	35	2	47	6	2	3	1	1		1	2015-01-11	1	1					1
224	19	2014-03-03	2014-12-12	9.5	5	33	1	45	7	3	5	2	1		1	2015-01-11	1	3	2015-03-29	22	1	35	1	4		1.3	1
225	20	2014-03-03	2014-12-12	9.5	5	28	1	23	11	5	15	1	1		1	2014-12-04	1	2
226	20	2014-03-10	2014-11-27	8.7	8	29	1	24	11	4	15	1	1		1	2014-12-31	1	1					1
227	20	2014-03-10	2014-11-27	8.7	8	33	2	35	1	1	10	2	1		1	2015-01-02	1	3	2015-06-21	9	1	23	1	1	1500	99.9	1
228	20	2014-03-10	2014-11-27	8.7	8	30	2	39	10	2	9	1	1		1	2014-12-30	1	3	2015-06-22	4	1	23	1	1	1215	3.5	1
229	20	2014-03-10	2014-11-27	8.7	8	33	1	37	1	3	13	2	1		1	2015-01-01	1	1					1
230	20	2014-03-10	2014-11-27	8.7	8	37	1	21	3	3	15	5	1		1	2015-01-03	1	1					1
231	20	2014-03-10	2014-11-27	8.7	8	38	1	21	3	3	11	5	1		1	2015-01-03	1	1					1
232	20	2014-03-10	2014-11-27	8.7	8	30	2	29	8	3	3	3	1		1	2015-01-01	1	1					1
233	20	2014-03-10	2014-11-27	8.7	8	40	1	22	5	3	2	4	1		1	2015-01-02	1	1					1
234	20	2014-03-10	2014-11-27	8.7	8	37	1	43	1	1	13	1	1		2	2015-01-02	1	3	2015-06-20	2	1	36	1	1	1871	2.3	1		0	0		2015-01-06	1	3	2015-06-05	4	1	36	1	1	1215	3.5	1	410	79	0
235	20	2014-03-10	2014-11-27	8.7	8	36	1	28	15	5	14	2	1		1	2015-01-03	1	2
236	20	2014-03-10	2014-11-27	8.7	8	46	1	36	1	3	3	1	2	3	0								1
[truncated: 16 more columns]
